# Supplementary material for: Development of Anti-Virulence Approaches for Candidiasis via a Novel Series of Small-Molecule Inhibitors of Candida albicans Filamentation
Source: PubMed Central journal article supplement (PMC5717394; doi:10.1128/mbio.01991-17), 2017-12-05

Untreated

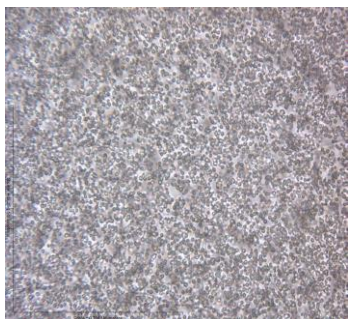

25  $\mu\text{M}$  DTPA

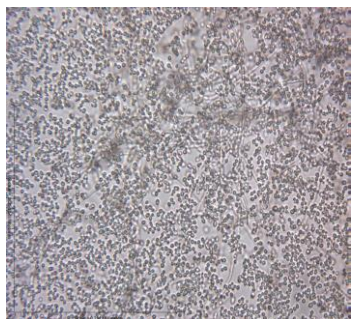

50  $\mu\text{M}$  DTPA

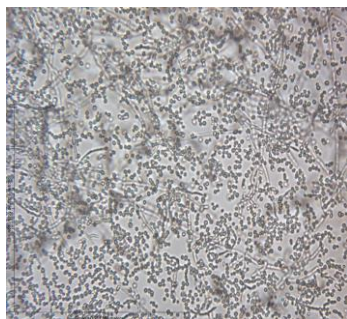

100  $\mu\text{M}$  DTPA

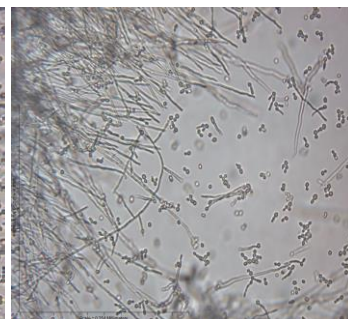

100  $\mu\text{M}$  DTPA +  
40  $\mu\text{M}$  9029936

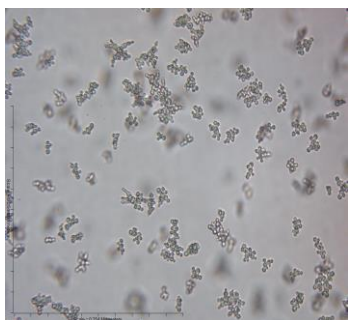

100  $\mu\text{M}$  DTPA +  
20  $\mu\text{M}$  9029936

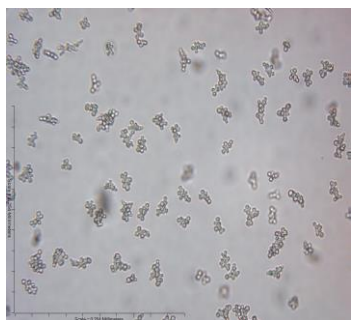

100  $\mu\text{M}$  DTPA +  
10  $\mu\text{M}$  9029936

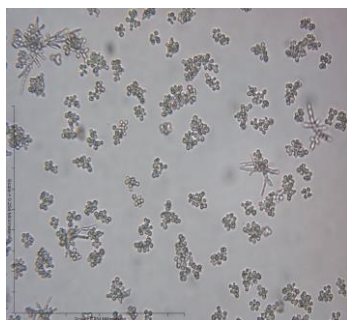

100  $\mu\text{M}$  DTPA +  
5  $\mu\text{M}$  9029936

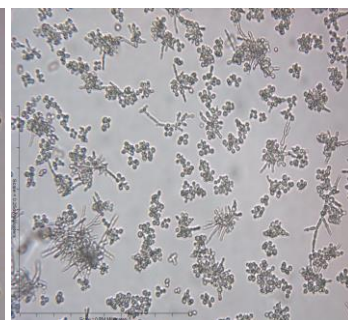

Supplement: mbo006173629sf3.pdf [file mbo006173629sf3.pdf]
