# Supplementary material for: Development of Anti-Virulence Approaches for Candidiasis via a Novel Series of Small-Molecule Inhibitors of Candida albicans Filamentation
Source: PubMed Central journal article supplement (PMC5717394; doi:10.1128/mbio.01991-17), 2017-12-05

**Pre-formed biofilms**

**9029936**

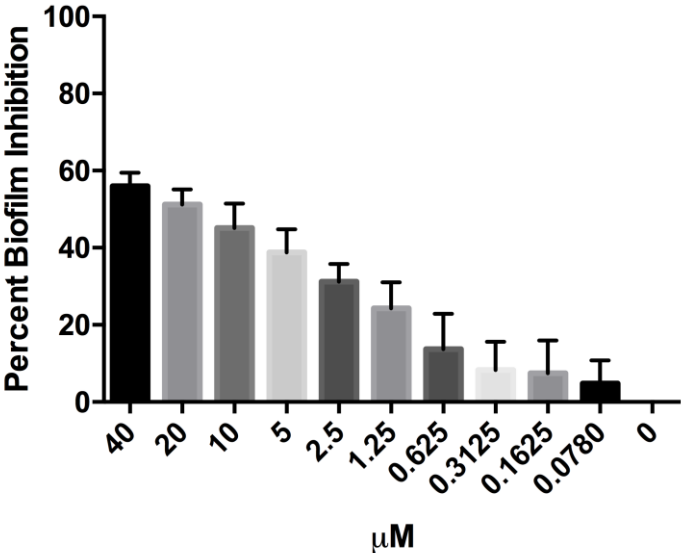

**7977044**

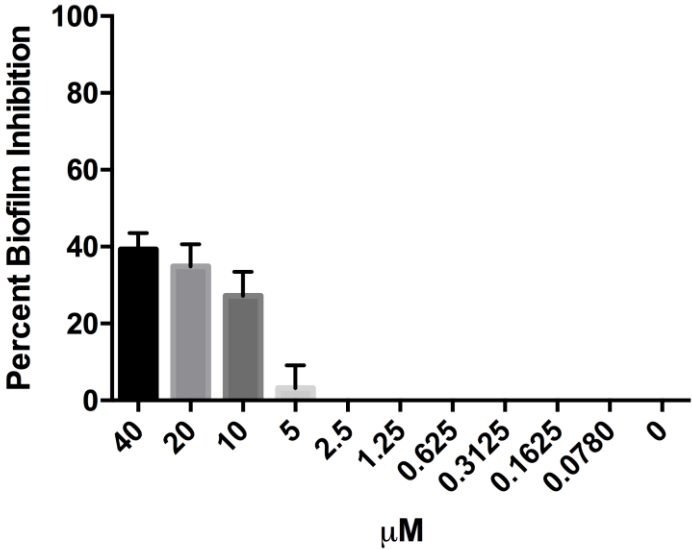

Supplement: mbo006173629sf7.pdf [file mbo006173629sf7.pdf]
