# Supplementary material for: Development of Anti-Virulence Approaches for Candidiasis via a Novel Series of Small-Molecule Inhibitors of Candida albicans Filamentation
Source: PubMed Central journal article supplement (PMC5717394; doi:10.1128/mbio.01991-17), 2017-12-05

**A**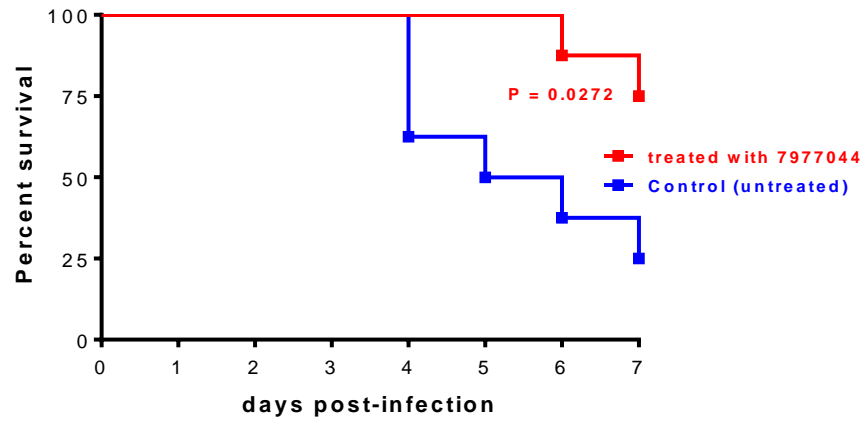**B**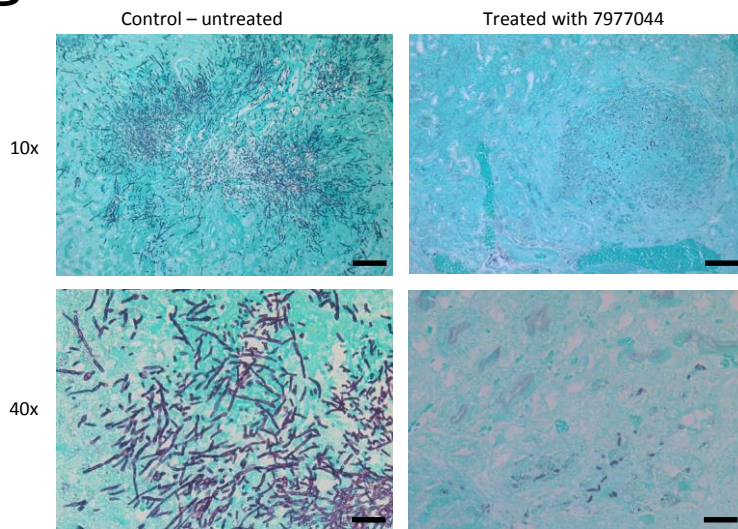

Supplement: mbo006173629sf9.pdf [file mbo006173629sf9.pdf]
